# Supplementary figures and images for: Acute and Transient Psychotic Disorder with Catatonia in a Patient with Congenital Right Ear Absence and Left Microtia: A Rare Neuropsychiatric Interface
Source: Research Square preprint supplement (doi:10.21203/rs.3.rs-7342313/v1), 2025-09-23

**
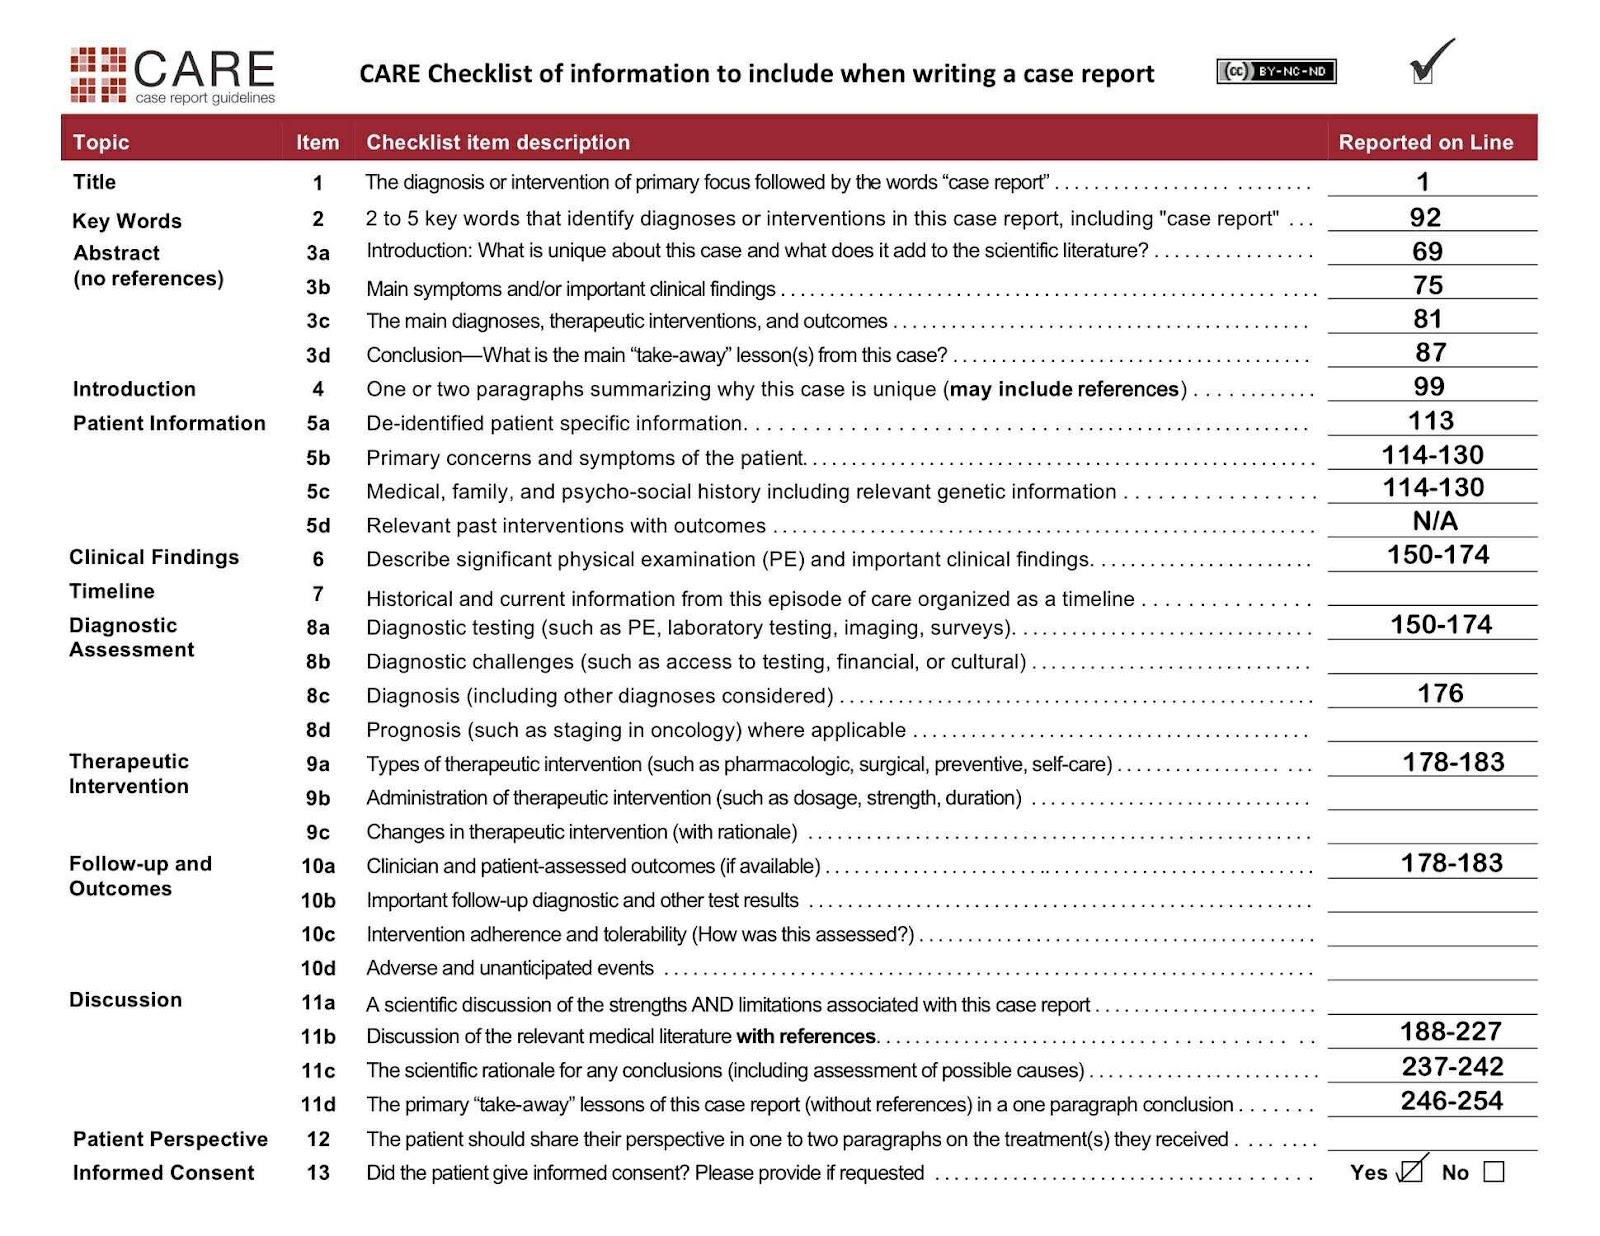
**

Supplement: Supplementary file 1 [file 04a7ebace8573ba305cf1394.docx]
